# Supplementary material for: Investigation of various fatty acid surfactants on the microstructure of flexible hydroxyapatite nanofibers
Source: Royal Society of Chemistry journal article supplement (doi:10.1039/d1ce00887k), 2021-01-01
Supplement: d1ce00887k1.pdf [file d1ce00887k1.pdf]

## **Electronic Supplementary Information for the Manuscript:**

### **Investigation of Various Fatty Acids Surfactants on the Microstructure of Flexible Hydroxyapatite Nanofibers**

Yin-chuan Wang<sup>a,b</sup>, Jian-ning Wang<sup>c</sup>, Gui-yong Xiao<sup>a,b,\*</sup>, Sheng-yun Huang<sup>d</sup>, Wei-li Xu<sup>a,b</sup>, Wen-xi Yan<sup>a,b</sup>, Yu-peng Lu<sup>a,b,\*</sup>

<sup>a</sup> Key Laboratory for Liquid-Solid Structural Evolution and Processing of Materials, Ministry of Education, Shandong University, Ji'nan, 250061, China

<sup>b</sup> School of Materials Science and Engineering, Shandong University, Ji'nan, 250061, China

<sup>c</sup> Department of VIP Center, Jinan Stomatology Hospital, Ji'nan, 250061, China

<sup>d</sup> Department of Oral and Maxillofacial Surgery, Shandong Provincial Hospital, Cheeloo College of Medicine, Shandong University, Ji'nan, 250021, China

#### **AUTHOR INFORMATION**

**Corresponding Author: Yu-peng Lu and Gui-yong Xiao**

\*E-mail: biosdu@sdu.edu.cn and xiaoguiyong@sdu.edu.cn

## Materials and characterization

Linoleic acid ( $C_{18}H_{32}O_2$ , > 95%(GC)), oleic acid ( $C_{18}H_{32}O_2$ , AR), and ricinoleic acid ( $C_{18}H_{34}O_3$ ,  $\geq 95\%$ (T)) were purchased from Aladdin Industrial Co. Ltd.. Stearic acid ( $C_{18}H_{36}O_2$ , AR), palmitic acid ( $C_{16}H_{32}O_2$ , AR), anhydrous calcium chloride ( $CaCl_2$ , AR), sodium hydroxide (NaOH, AR) and sodium dihydrogen phosphate dihydrate ( $NaH_2PO_4 \cdot 2H_2O$ , AR) were purchased from Sinopharm Chemical Reagent Co. Ltd. All chemical reagents were used as received and without any further purification.

The X-ray powder diffraction (XRD) patterns of the as-prepared samples were recorded using an X-ray diffractometer (Rigaku DMAX-2500PC, Cu  $K\alpha$  radiation,  $\lambda = 1.5418 \text{ \AA}$ ). The functional groups of the products were characterized using Fourier transform infrared spectroscopy (FT-IR) (Thermo Nicolet Nexus 670). Thermogravimetric (TG) curves of the samples were measured on a thermal analyzer (Netzsch TG209) at a heating rate of  $10 \text{ }^\circ\text{C} \cdot \text{min}^{-1}$  in a flow of air. Field-emission scanning electron microscopy (FESEM) images of the as-prepared products were recorded with a field-emission scanning electron microscope (JEOL JSM-7800F). Element contents of corresponding samples are analyzed by an energy dispersive spectrometer (EDS) analyzer (Oxford instruments X-max 80). TEM (JEOL JEM-2100) was conducted to analyze the morphology and crystal lattice of the as-prepared HA nanofibers.

The crystallinity degrees ( $X_C$ ) of the as-prepared products were calculated using<sup>1</sup>:

$$X_C = 1 - \frac{V_{112/300}}{I_{300}}$$

The crystallite sizes ( $D_{hkl}$ ) were calculated using the ‘Debye-Scherrer equation’<sup>2</sup>. The lattice parameters were made using MDI Jade 6.5<sup>3</sup>.

## References

1. E. Landi, A. Tampieri, G. Celotti and S. Sprio, *J. Eur. Ceram. Soc.*, 2000, **20**, 2377-2387.

2. B. Ma, S. Zhang, F. Liu, J. Duan, S. Wang, J. Han, Y. Sang, X. Yu, D. Li, W. Tang, S. Ge and H. Liu, *ACS Appl Mater Interfaces*, 2017, **9**, 33717-33727.
3. Y. Sun, H. Yang and D. Tao, *Ceram. Int.*, 2011, **37**, 2917-2920.

Table S1. Summary of characteristics of the as-prepared samples.

| Sample ID | Fatty acids     | Crystallinity<br>/% | Ca/P ratio of the<br>product | Crystallite size*   |                     |                   | Lattice parameter |                |
|-----------|-----------------|---------------------|------------------------------|---------------------|---------------------|-------------------|-------------------|----------------|
|           |                 |                     |                              | $D_{211}/\text{nm}$ | $D_{300}/\text{nm}$ | $D_{300}/D_{211}$ | $a/\text{\AA}$    | $c/\text{\AA}$ |
| NF1       | linoleic acid   | 83.54               | 1.53†; 1.10                  | 42.38               | 45.29               | 1.07              | 9.4029            | 6.9008         |
| NF2       | oleic acid      | 93.06               | 1.33                         | 26.74               | 33.42               | 1.25              | 9.4148            | 6.9031         |
| NF3       | ricinoleic acid | 89.35               | 1.46†; 1.30                  | 19.96               | 52.79               | 2.64              | 9.3566            | 7.0253         |
| NF4       | stearic acid    | 94.82               | 1.55†; 1.29                  | 10.44               | 62.78               | 6.01              | 9.4297            | 7.0322         |
| NF5       | palmitic acid   | 86.01               | 1.33                         | 19.12               | 24.66               | 1.29              | 9.4425            | 6.9233         |

\*Note:  $D_{hkl}$  is the crystallite size in the direction perpendicular to the  $(hkl)$  lattice plane.

†Note: data represents the Ca/P ratio of HA microrod.

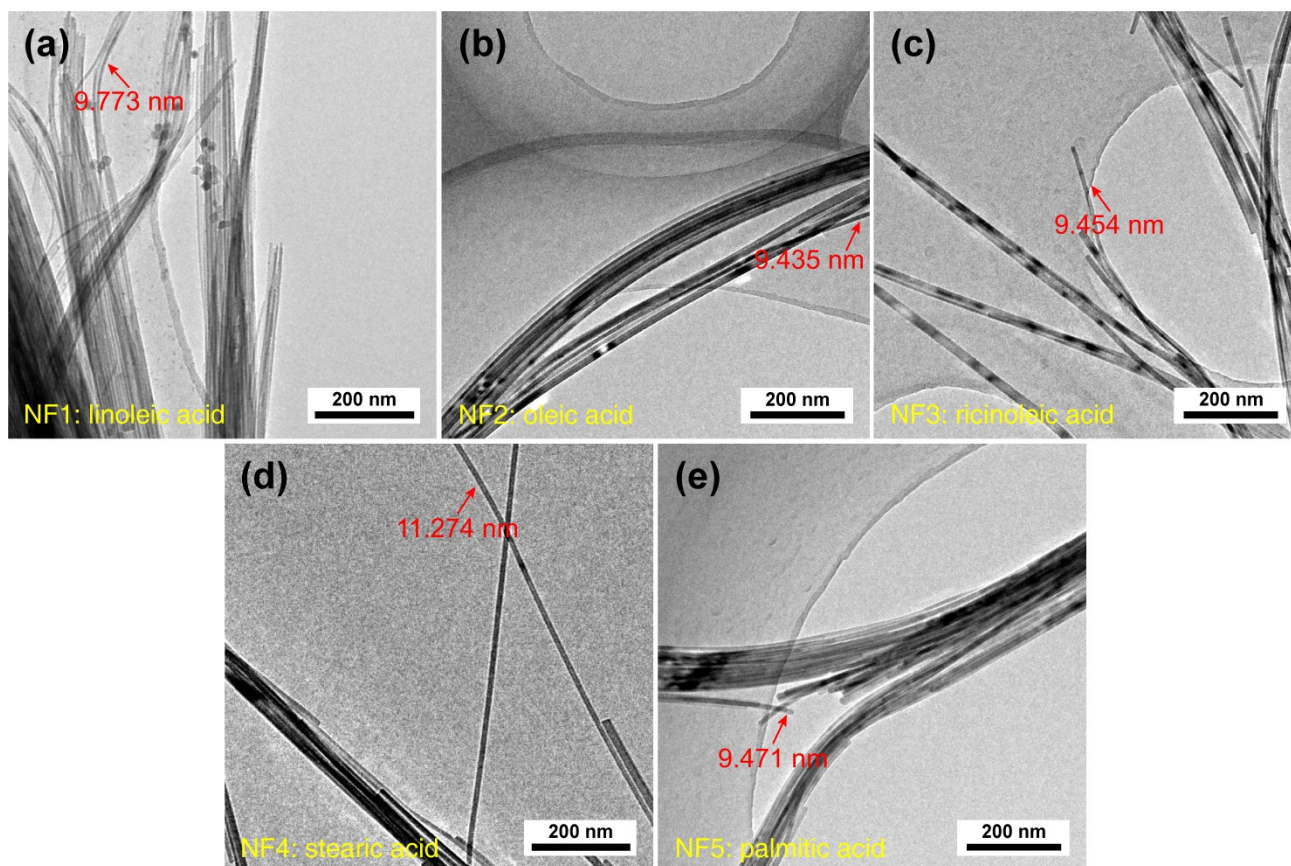

Fig. S1 TEM images of the as-prepared samples synthesized by using different kinds of fatty acids as surfactants.
